# Supplementary material for: Antimicrobial hydrogels based on autoclaved poly(vinyl alcohol) and poly(methyl vinyl ether-alt-maleic anhydride) mixtures for wound care applications
Source: Royal Society of Chemistry journal article supplement (doi:10.1039/c6ra08234c), 2016-01-01
Supplement: c6ra08234c1.pdf [file c6ra08234c1.pdf]

### Antimicrobial hydrogels based on autoclaved poly(vinyl alcohol) and poly(methyl vinyl ether-*alt*-maleic anhydride) mixtures for wound care applications

Enrica Caló,<sup>a</sup> Joao M.S. de Barros,<sup>a</sup> Mar Fernández-Gutiérrez,<sup>b,c</sup> Julio San Román,<sup>b,c</sup> Lucy Ballamy,<sup>d</sup> Vitaliy V. Khutoryanskiy<sup>a</sup>

<sup>a</sup>Reading School of Pharmacy, University of Reading, Reading, Berkshire, RG6 6AD, United Kingdom

<sup>b</sup>Institute of Polymer Science and Technology, CSIC, C/Juan de la Cierva 3, Madrid 28006, Spain

<sup>c</sup>CIBER-BBN, C/ Monforte de Lemos 3-5, Madrid 28029, Spain

<sup>d</sup>ConvaTec UK Ltd, First Avenue-Deeside Industrial Park, Flintshire CH5 2NU, Wales, United Kingdom.

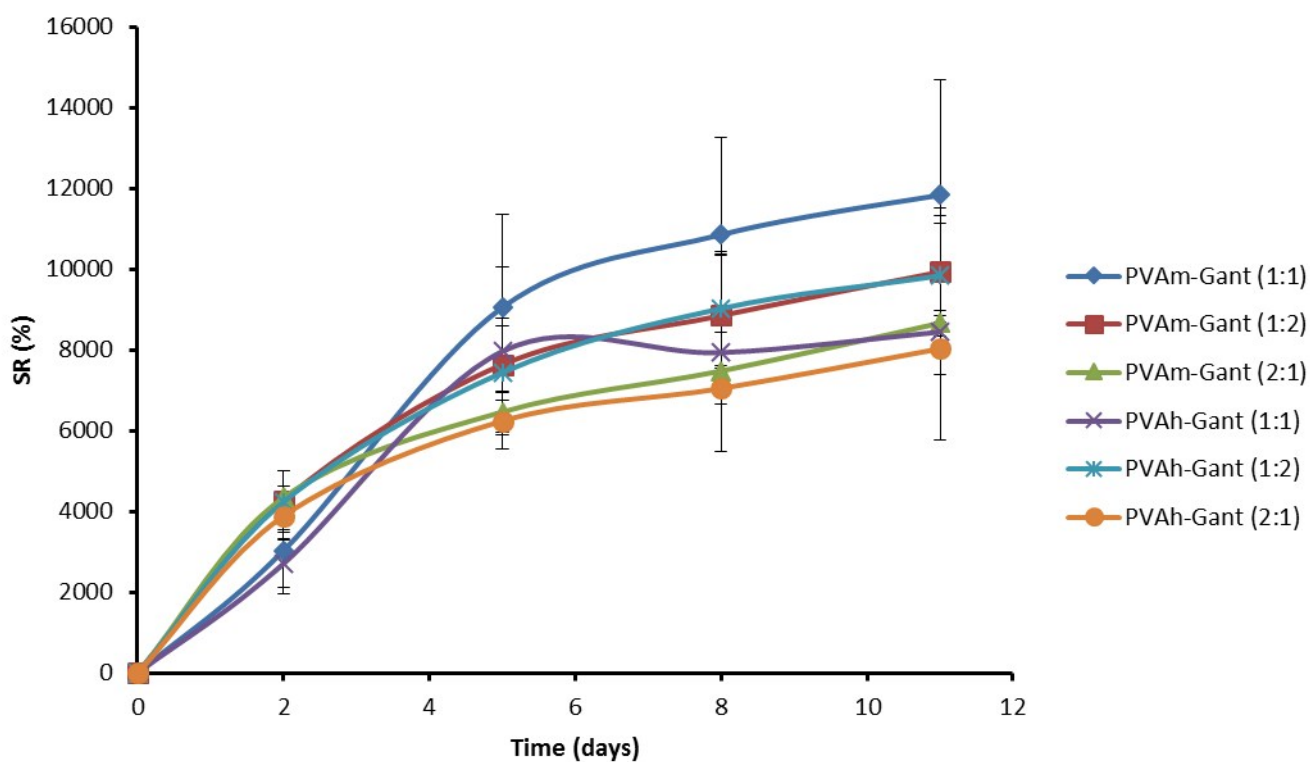

**Fig. S1.** Swelling kinetics for PVAm-Gant and PVAh-Gant autoclaved hydrogels in deionized water.

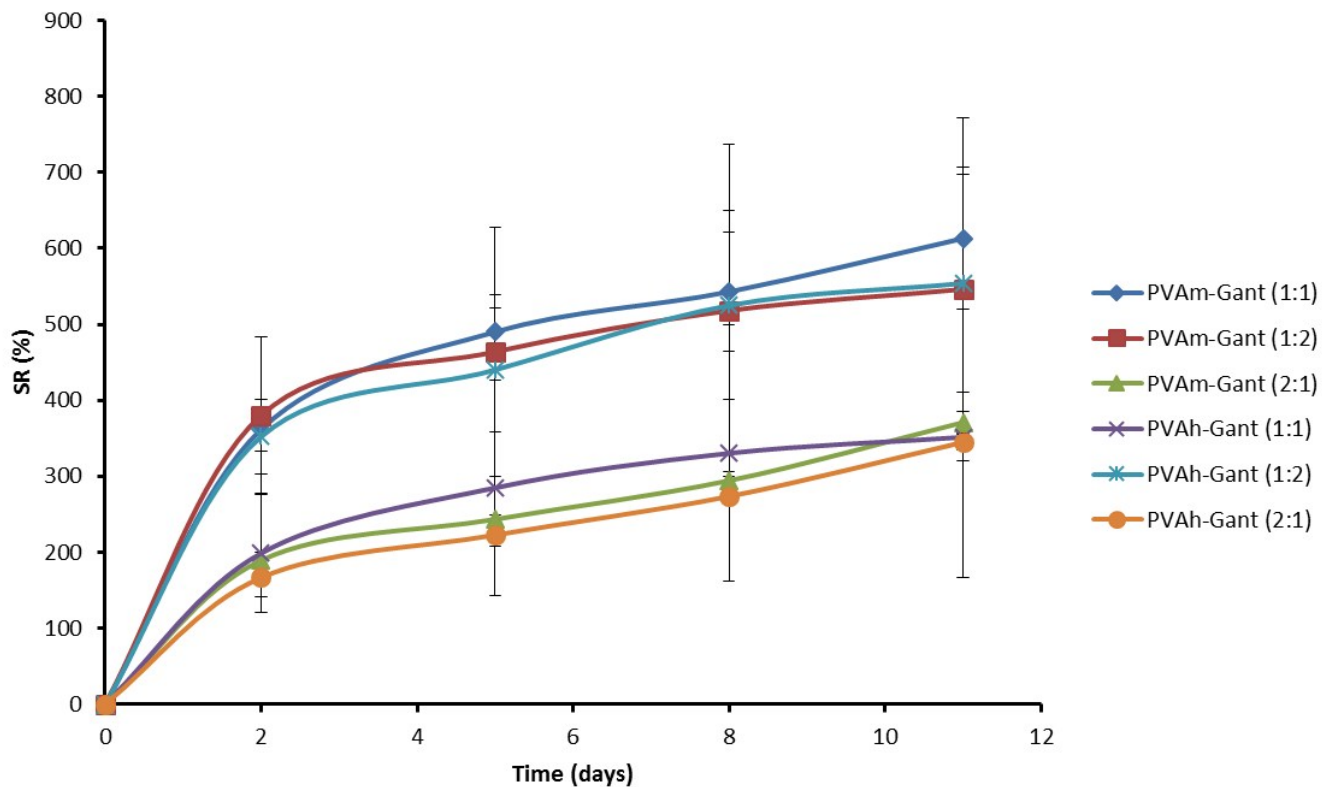

**Fig. S2.** Swelling kinetics for PVAm-Gant and PVAh-Gant autoclaved hydrogels in simulated wound fluid.

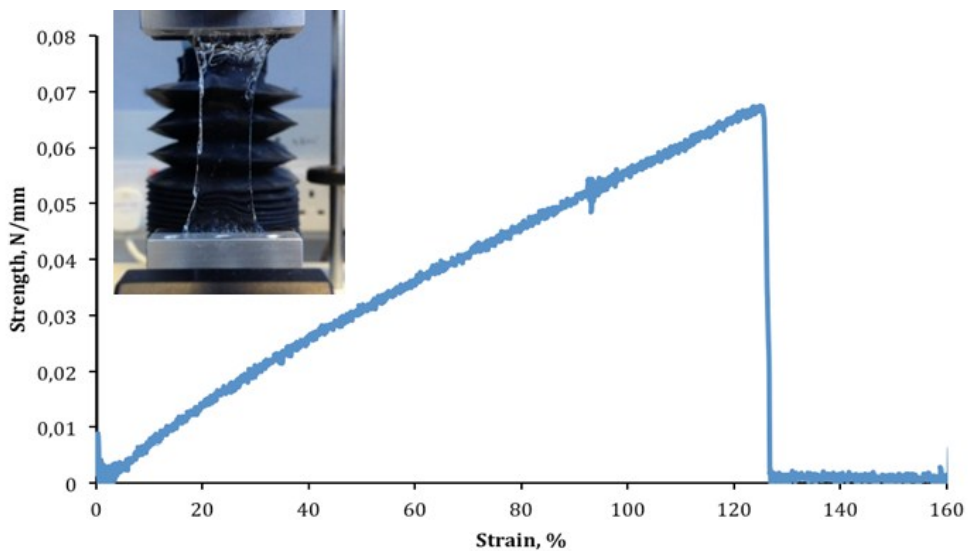

**Fig. S3.** Strength vs strain curve exemplary and image of PVA-Gantrez<sup>®</sup> AN hydrogel stretching from the tensile test conducted using a Texture Analyzer (Stable Micro Systems Ltd, UK).

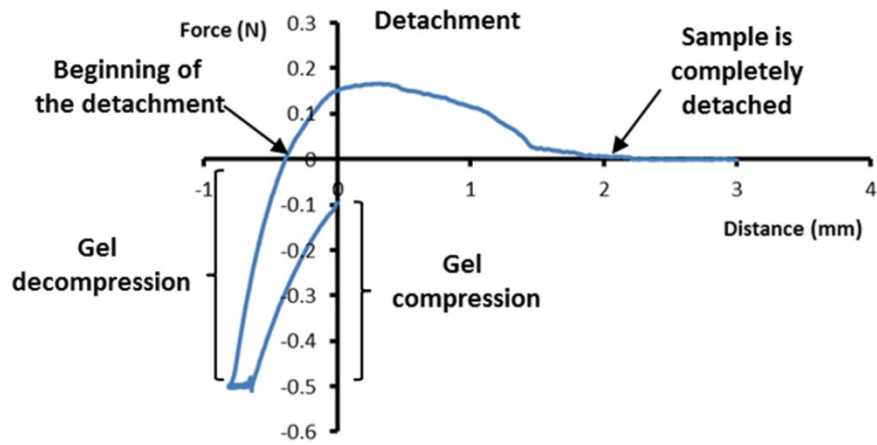

**Fig. S4.** Exemplary profile of the detachment of autoclaved PVA-Gantrez<sup>®</sup> AN hydrogel sample from porcine skin during the adhesion test performed using a Texture Analyzer (Stable Micro Systems Ltd, UK).
